# Supplementary material
Source: PubMed Central journal article supplement (PMC1895212)
Supplement: blood_2005-03-0860_1.pdf [file blood_2005-03-0860_1.pdf]

Table S1. Gene Specific PCR Primer Sequences

| Gene             | Size (bp) | Anneal (°C) | Cycle | 5' Primer Sequence                                          | 3' Primer Sequence                              |
|------------------|-----------|-------------|-------|-------------------------------------------------------------|-------------------------------------------------|
| PU.1             | 552       | 60          | 34    | 5'-TGGAAGGGTTTTCCCTCACC                                     | 5'-TGCTGTCCTTCATGTCGCCG                         |
| G-CSFR           | 574       | 60          | 34    | 5'-CCCCTCAAACCTATCCTGCCTC                                   | 5'-TCCAGGCAGAGATGAGCGAATG                       |
| IL-3R $\alpha$   | 181       | 55          | 35    | 5'-TGCATGGACAACACTGTGGA                                     | 5'-TGTATTCCTGTGGCTCTGAG                         |
| GM-CSFR $\alpha$ | 264       | 60          | 35    | 5'-GCGGGCGACACGAGGATGAAGCAC                                 | 5'-CTAGGGCTGCAGGAGGTCCTTCCT                     |
| $\beta$ c        | 317       | 60          | 35    | 5'-CTTTGGCTGTGTCTCTGTAT                                     | 5'-GAAGTTGCTCTGTGGATTCTG                        |
| EBF              | 424       | 62          | 34    | 5'-GCCAACAGCGAAAAGACC                                       | 5'-GCTTGGAGTTATTGTGGAC                          |
| Pax5             | 439       | 65          | 35    | 5'-CTACAGGCTCCGTGACGCAG                                     | 5'-TCTCGGCCTGTGACAATAGG                         |
| VpreB            | 400       | 60          | 32    | 5'-GTCTGAATTCCTCCAGAGCCTAAG-A<br>TCCC                       | 5'-CAGGTCTAGAGCCATGGCCTGGA-<br>CGTCTG           |
| $\lambda$ 5      | 205       | 60          | 32    | 5'-GGGTCTAGTGGATGGTGTCC                                     | 5'-CAAACTGGGGCTTAGATGG                          |
| Rag1             | 554       | 60          | 35    | 5'-TGCAGACATTCTAGCACTCTGGCC                                 | 5'-ACATCTGCCTTCACGTCGATCCGG                     |
| IL-7R $\alpha$   | 302       | 60          | 35    | 5'-CGAGTGAAATGCCTAACTC                                      | 5'-GCGTCCAGTTGCTTTTAC                           |
| HPRT             | 250       | 60          | 30    | 5'-CACAGGACTAGAACACCTGC                                     | 5'-GCTGGTGAAAAGGACCTCT                          |
| Flanked allele   | 186       | 56          | 35    | 5'-CCCAGAACCTTCCCCTATTC                                     | 5'-AGCTTATCGATAACCGTCGAGG                       |
| Excised allele   | 150       | 56          | 35    | 5'-CACATGGCCCCTTTGGAC                                       | 5'-CAACCGGATCTAGACTCGAGGA                       |
| IgH (germline)   |           | 60          | 35    | 5'-GGAGAGAGTTTTAGTATAGGAACA<br>GAGGC (J <sub>H</sub> 1)     | 5'-AGGCTCTGAGATCCCTAGACAG<br>(J <sub>H</sub> 4) |
| IgH (rearranged) |           | 60          | 35    | 5'-CACAGACCTTTCTCCATAGTTGATA<br>ACTCAG (D <sub>H</sub> Q52) | 5'-AGGCTCTGAGATCCCTAGACAG<br>(J <sub>H</sub> 4) |
